# Supplementary material
Source: bioRxiv or medRxiv preprint supplement (https://www.biorxiv.org/content/biorxiv/early/2021/04/23/2021.04.23.441075/DC1/embed/media-1.pdf)
Supplement: Supplementary file [file media-1.pdf]

1 **Supplementary Information for “*In vivo* KRAS G12D/V Degradation Mediated by**

2 **CANDDY Using a Modified Proteasome Inhibitor”**

3 Satoshi Imanishi, Lijuan Huang, Shoko Itakura, Masamichi Ishizaka, Megumi

4 Tsukamoto, Megumi Saito, Yoichi Iwasaki, Tomohiro Yamaguchi, and Etsuko

5 Miyamoto-Sato\*.

6 \*Correspondence: nekoneko@rs.tus.ac.jp

7

8 **General.** Nuclear magnetic resonance (NMR) spectra were recorded on a JEOL  
9 JNM-ECS-400 spectrometer operating at 400 MHz for <sup>1</sup>H-NMR. Chemical shifts were  
10 reported in the scale relative to solvent described respectively as an internal reference.  
11 High resolution fast-atom bombardment mass spectrometry (HR-MS FAB) was  
12 performed on a JEOL JMS-700. Column chromatography was performed with silica gel  
13 60N (spherical, neutral) purchased from Kanto Chemical Co., Inc. and with NH silica  
14 gel (NH-DM1020) purchased from Fuji Silysia Chemical Ltd. Reversed phase liquid  
15 chromatography was performed with high performance liquid chromatography (HPLC)  
16 (Shimadzu Co., Ltd). HPLC experiment for the term of ‘The synthesis of TUS-007’ was  
17 performed with a TSK-Gel ODS-80TM (Tosoh Corp.) (4.6 x 150 mm) with a gradient  
18 of 5-95% acetonitrile in water with 0.1% trifluoroacetic acid (0 min 5%, 2 min 5%, 15  
19 min 95%, 20 min 95%, 1 mL/min, 40°C). HPLC experiment for the term of ‘the  
20 synthesis of MDM2-CANDDY’ was performed with a Inertsil ODS-4 (GL Science) (4.6  
21 x 250 mm) with isocratic condition (MeCN/water/TFA=750/250/1, 1.0 mL/min, 40°C),  
22 unless otherwise noted.

23 Glycyl-L-leucine was purchased from Combi-Blocks Inc. *N*-Boc-L-isoleucine was  
24 purchased from Watanabe Chemical Industry.

25

26 **The synthesis of TUS-007.**

27 TUS-007 was synthesized as shown below. Some of the compounds were synthesized

28 by NARD Institute. Ltd. (Kobe, Japan).

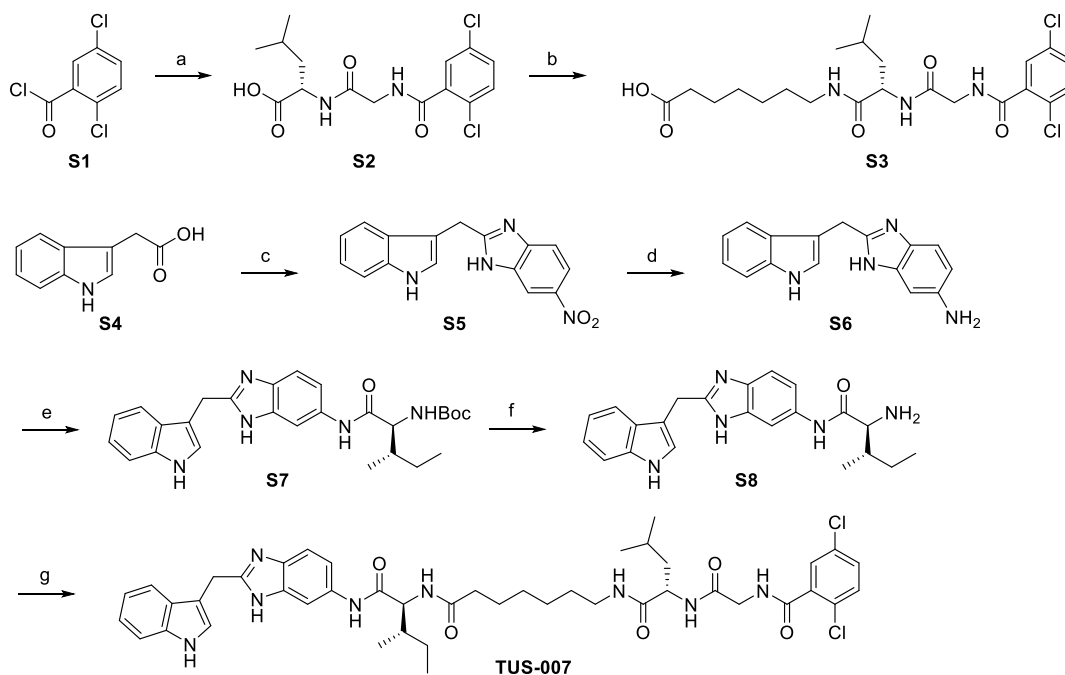

29 Reagent and conditions: (a) Glycyl-L-leucine, 1N NaOH<sub>aq.</sub>, THF 0°C, 88%; (b) (i) HOSu, EDC-HCl, CH<sub>2</sub>Cl<sub>2</sub>, 0°C to rt, (ii) 7-Amino-heptanoic acid, Triethylamine, DMF, 0°C to rt, 72%; (c) (i) CDI, THF, 0°C to rt; 4-Nitro-1,2-phenylenediamine, 47°C, (ii) AcOH, reflux, 88%; (d) H<sub>2</sub>, Pd/C, MeOH, rt, 62%; (e) *N*-Boc-L-isoleucine, COMU, DIPEA, MeCN, 0°C to rt, *quant.*; (f) TFA, CH<sub>2</sub>Cl<sub>2</sub>, rt, 76%; (g) **S3**, HATU, DIPEA, DMF, 0°C to rt, 53%.

30 To a solution of glycyl-L-leucine (125 g, 664 mmol) in 1N NaOH<sub>aq.</sub> (1.3 L)  
31 with tetrahydrofuran (THF: 550 mL), 2,5-dichlorobenzoyl chloride (127 g, 604 mmol,  
32 **S1**) in THF (250 mL) was added dropwise at 0°C. After stirring for 2 h at the same

33 temperature, the resulting solution was acidified (ca. pH2) with 2N HCl<sub>aq</sub>. and  
34 extracted with CHCl<sub>3</sub> (total 3 L). The combined organic layer was washed with brine,  
35 dried over MgSO<sub>4</sub>, filtered, and concentrated *in vacuo*. The residue was suspended in  
36 diisopropyl ether (IPE: 1.2 L) and stirred for 30 min at 50°C. The resulting suspension  
37 was cooled to room temperature, and a precipitate was filtered, washed with IPE (500  
38 mL), and thus **S2** (194 g, 88 % yield, white solid) was obtained. **S2**: <sup>1</sup>H-NMR (400 MHz,  
39 DMSO-d<sub>6</sub>) δ 8.77 (t, *J* = 6.0 Hz, 1H), 8.15 (d, *J* = 8.0 Hz, 1H), 7.54 (s, 3H), 4.24-4.30  
40 (m, 1H), 3.84-3.95 (m, 2H), 1.60-1.70 (m, 1H), 1.48-1.59 (m, 2H), 0.90 (d, *J* = 6.4 Hz,  
41 3H), 0.86 (d, *J* = 6.4 Hz, 3H). HPLC: t<sub>R</sub> = 11.82 min, purity; 94.0% (λ = 254 nm).  
42 (i) To a solution of **S2** (194g, 536 mmol) in CH<sub>2</sub>Cl<sub>2</sub> (1.6 L), *N*-hydroxysuccinimide  
43 (HOSu: 2.5 g, 804 mmol) and 1-ethyl-3-(3-dimethylaminopropyl) carbodiimide  
44 hydrochloride (EDC-HCl: 54 g, 804 mmol) were added at 0°C under Ar atmosphere.  
45 After stirring for 3 h at room temperature, the resulting solution was washed with water  
46 (1 L) three times, dried over MgSO<sub>4</sub>, filtered, and concentrated *in vacuo*. (ii) The  
47 residue (309 g) was dissolved in DMF (1.5 L) at Ar atmosphere, and 7-aminoheptanoic  
48 acid (77.8 g, 536 mmol) and triethylamine (178 mL) were added to the solution at 0°C.

49 After stirring overnight at room temperature, 1N HCl<sub>aq</sub>. (1.5 L), water (1 L) and AcOEt  
50 (3 L) were added and extraction was performed using AcOEt (1.5 L). The combined  
51 organic layer was dried over Na<sub>2</sub>SO<sub>4</sub>, filtered, concentrated *in vacuo* and azeotroped  
52 with toluene. The residue (394 g) was purified by silica gel column chromatography  
53 (4.5 kg, elution with 0-5 % MeOH/CHCl<sub>3</sub>) and thus **S3** (190 g, 72 % yield, white solid)  
54 was obtained. **S3**: <sup>1</sup>H-NMR (400 MHz, DMSO-d<sub>6</sub>) δ 11.96 (s, 1H), 8.78 (t, *J* = 6.0 Hz,  
55 1H), 7.96 (d, *J* = 8.2 Hz, 1H), 7.92 (t, *J* = 5.5 Hz, 1H), 7.53 (s, 3H), 4.26-4.31 (m, 1H),  
56 3.82-3.92 (m, 2H), 2.94-3.09 (m, 2H), 2.16 (t, *J* = 7.3 Hz, 2H), 1.35-1.60 (m, 7H),  
57 1.18-1.27 (m, 4H), 0.87 (d, *J* = 6.4 Hz, 3H), 0.84 (d, *J* = 6.4 Hz, 3H).

58 (i) To a solution of indol-3-ylacetic acid (100 g, 571 mmol, **S4**) in THF (200 mL),  
59 1,1'-Carbonyldiimidazole (CDI: 109 g, 674 mmol) was added in portions over 15 min at  
60 0°C under Ar atmosphere. After stirring for 30 min at room temperature,  
61 4-nitro-1,2-phenylenediamine (96.2 g, 628 mmol) was added, and stirred for 30 min at  
62 same temperature. The resulting solution was warmed to 47°C and concentrated *in*  
63 *vacuo* after stirring overnight. (ii) The residue was dissolved in AcOH (2 L) with  
64 ice-cooling and heated to reflux for 2 h. The resulting solution was concentrated *in*

65 *vacuo* and azeotroped with toluene. The residue was dissolved in AcOEt (1 L), and  
66 insoluble portion was filtered on a Celite-pad, then washed with AcOEt (0.8 L). The  
67 filtrate was washed with water (1.5 L) and brine (1 L), dried over Na<sub>2</sub>SO<sub>4</sub>, and  
68 concentrated *in vacuo*. The residue (298 g) was purified by silica gel column  
69 chromatography (2 kg, elution with 0-30 % AcOEt/CHCl<sub>3</sub>) and thus **S5** (146 g, 88 %  
70 yield, brown amorphous) was obtained. **S5**: <sup>1</sup>H-NMR (400 MHz, DMSO-d<sub>6</sub>) δ 11.03 (s,  
71 1H), 9.67 (s, 1H), 8.02-8.42 (m, 2H), 7.28-7.70 (m, 4H), 6.93-7.10 (m, 2H), 4.37 (s,  
72 2H).

73 To a solution of **S5** (146 g, 500 mmol) in MeOH (1 L), Pd/C (20.0 g) was added and  
74 stirred overnight at room temperature under H<sub>2</sub> atmosphere. The resulting solution was  
75 filtered on a Celite-pad, washed with MeOH (2 L), and concentrated *in vacuo*. The  
76 residue was purified by silica gel column chromatography (3.0 kg, elution with 5-20 %  
77 MeOH/CHCl<sub>3</sub>) and thus **S6** (85.4 g, 62 % yield, black solid) was obtained. **S6**: <sup>1</sup>H-NMR  
78 (400 MHz, DMSO-d<sub>6</sub>) δ 7.45-7.47 (m, 1H), 7.33-7.35 (m, 1H), 7.24-7.25 (m, 1H),  
79 7.11-7.13 (m, 1H), 7.03-7.07 (m, 1H), 6.91-6.94 (m, 1H), 6.56-6.57 (m, 1H), 6.42-6.44

80 (m, 2H), 4.16 (s, 2H), 3.35 (br s, 2H). HPLC:  $t_R = 9.08$  min, purity; 97.9% ( $\lambda = 254$  nm).

81 HPLC:  $t_R = 12.26$  min, purity; 87.2% ( $\lambda = 254$  nm).

82 To a solution of **S6** (81.9 g, 351 mmol) in MeCN (1.2 L), *N*-ethyl-diisopropylamine

83 (DIPEA: 119 mL) and (1-Cyano-2-ethoxy-2-oxoethylideneaminoxy)dimethylamino-

84 morpholinocarbenium Hexafluorophosphate (COMU: 58 g, 368 mmol) were added at

85 0°C under Ar atmosphere, and stirred for 1 h at room temperature. After cooling to 0°C,

86 *N*-Boc-L-isoleucine (89.4 g, 341 mmol) was added and stirred overnight at room

87 temperature, and then concentrated *in vacuo*. The residue was diluted with CHCl<sub>3</sub> (2 L)

88 and washed with water (1.5 L) twice, concentrated *in vacuo*, and thus **S7** (330 g, *quant.*,

89 black oil) was obtained. This compound was used in the next step without further

90 purification.

91 To a solution of **S7** (330 g) in CH<sub>2</sub>Cl<sub>2</sub> (1.6 L), trifluoroacetic acid (TFA: 800 mL) was

92 added at room temperature under Ar atmosphere and stirred for 2 h at the same

93 temperature. The resulting solution was concentrated *in vacuo*, and then dissolved in

94 AcOEt (1 L), washed with *sat.* NaHCO<sub>3</sub>*aq.* (600 mL) twice, dried over Na<sub>2</sub>SO<sub>4</sub>, filtered,

95 and concentrated *in vacuo*. The residue (315 g) was purified by NH-silica gel column

96 chromatography (2.3 kg, elution with 0-5 % MeOH/CHCl<sub>3</sub>), and thus **S8** (97.5 g, 76 %  
97 yield, yellow solid) was obtained. **S8**: <sup>1</sup>H-NMR (400 MHz, DMSO-d<sub>6</sub>) δ 11.97 (s, 1H),  
98 10.94 (s, 1H), 9.72 (s, 1H), 7.95-7.13 (m, 6H), 7.07-7.03 (m, 1H), 6.95-6.91 (m, 1H),  
99 4.23 (s, 2H), 3.18-3.11 (m, 1H), 1.67-1.48 (m, 2H), 1.21-1.06 (m, 1H), 0.95-0.81 (m,  
100 6H). HPLC: t<sub>R</sub> = 9.80 min, purity; 87.8% (λ = 254 nm).

101 To a solution of **S3** (139 g, 285 mmol) in *N,N*-dimethylformamide (DMF: 1250 mL),  
102 DIPEA (77.1 mL) and  
103 1-[bis(dimethylamino)methylene]-1*H*-1,2,3-triazolo[4,5-*b*]pyridinium 3-oxide  
104 hexafluorophosphate (HATU: 109 g, 259 mmol) were added at 0°C under Ar  
105 atmosphere. After stirring for 30 min at the same temperature, **S8** (97.4 g, 259 mmol)  
106 was added at 0°C and stirred overnight at room temperature. The resulting solution was  
107 diluted with AcOEt (2.5 L) and water (1.5 L) and extracted with AcOEt (1.5 L). The  
108 combined organic layer was concentrated *in vacuo* and azeotroped with toluene. The  
109 residue (448 g) was purified by NH-silica gel (6.0 kg, elution with 0-4 %  
110 MeOH/CHCl<sub>3</sub>) and concentrated *in vacuo*. After dissolving in MeOH (500 mL),  
111 insoluble was filtered off and the filtrate was concentrated *in vacuo*. The residue was



112 suspended in Me<sub>2</sub>CO (1.5 L), stirred, and cooled to room temperature. Subsequently, a  
113 precipitate was collected, and thus **TUS-007** (117 g, 53 % yield, yellow solid) was  
114 obtained. **TUS-007**: <sup>1</sup>H-NMR (400 MHz, DMSO-d<sub>6</sub>) δ 11.93-11.97 (m, 1H), 10.92 (s,  
115 1H), 9.96 (d, *J* = 22.4 Hz, 1H), 8.78 (t, *J* = 5.7 Hz, 1H), 7.88-7.97 (m, 4H), 7.52 (s, 3H),  
116 7.34 (d, *J* = 8.2 Hz, 1H), 7.14-7.44 (m, 4H), 7.02-7.06 (m, 1H), 6.89-6.93 (m, 1H),  
117 4.22-4.38 (m, 4H), 3.81-3.92 (m, 2H), 2.94-3.08 (m, 2H), 2.07-2.21 (m, 2H), 1.75-1.82  
118 (m, 1H), 1.36-1.59 (m, 8H), 1.08-1.28 (m, 5H), 0.87 (d, *J* = 6.4 Hz, 3H), 0.74-0.88 (m,  
119 6H), 0.83 (d, *J* = 6.4 Hz, 3H). HR-MS (FAB) *m/z*: 845.3674 (Calcd for C<sub>44</sub>H<sub>55</sub>Cl<sub>2</sub>N<sub>8</sub>O<sub>5</sub>  
120 [M+H]<sup>+</sup> 845.3672). HPLC: *t<sub>R</sub>* = 13.09 min, purity; 96.7% (λ = 254 nm).  
121

122

123 **The synthesis of MDM2-CANDDY.**

124 MDM2-CANDDY was synthesized as shown below. Some of the compounds were

125 synthesized by NARD Institute. Ltd. (Kobe, Japan).

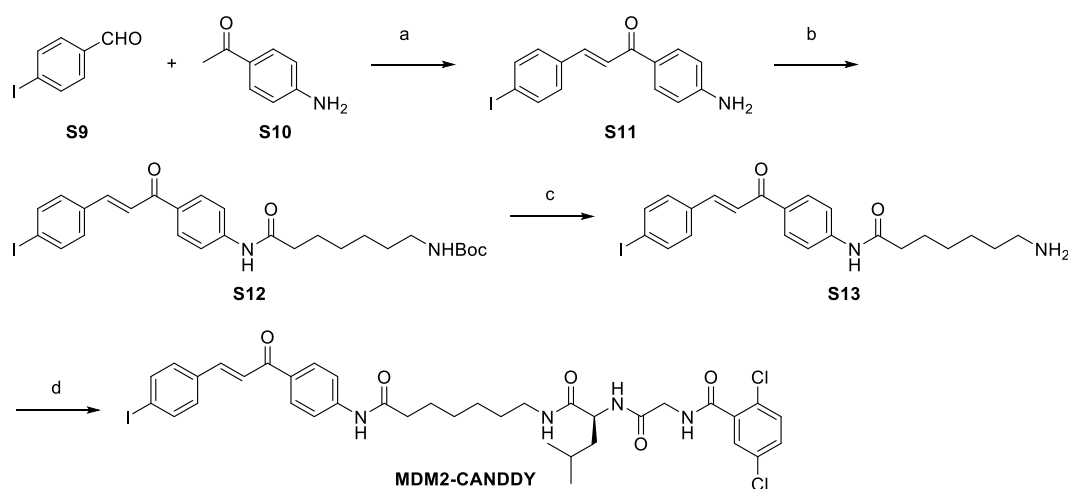

126

Reagent and conditions: (a) 40% KOH<sub>aq.</sub>, EtOH, 0°C to rt, 60%; (b) 7-((*tert*-Butoxycarbonyl)amino)heptanoic acid, HATU, DIPEA, DMAP, DMA/CH<sub>2</sub>Cl<sub>2</sub>, 0°C to rt, 70%; (c) TFA, CH<sub>2</sub>Cl<sub>2</sub>, 0°C, 99%; (d) CANDDY-MLN, HATU, DIPEA, DMF/CH<sub>2</sub>Cl<sub>2</sub>, 0°C to rt, 65%.

127

To a solution of 4-Iodobenzaldehyde (7.00 g, 30.1 mmol, **S9**) and

128

4'-Aminoacetophenone (4.08 g, 30.1 mmol, **S10**) in EtOH (90 mL), 40% KOH<sub>aq.</sub> (60

129

mL) was added dropwise over 1 h at 0°C and stirred for 1 h under Ar atmosphere. After

130

stirring for 6 h at room temperature, the resulting solution was cooled to 12°C. A

131

precipitate was collected by filtration and washed with EtOH-water (1:2, 80 mL). The

132

collected solid was dissolved in CHCl<sub>3</sub> (800 mL) and the insoluble content was filtered

133

and removed. The filtrate was washed with water twice, dried over Na<sub>2</sub>SO<sub>4</sub>, filtered,

134 concentrated *in vacuo*, and thus **S11** (6.27 g, 60% yield, yellow solid) was obtained.

135 This compound was used without further purification. **S11**: <sup>1</sup>H-NMR (400 MHz,  
136 DMSO-d<sub>6</sub>) δ 6.91-6.86 (m, 3H), 6.78 (d, *J* = 8.2 Hz, 2H), 6.62 (d, *J* = 8.2 Hz, 2H), 6.52  
137 (d, *J* = 15.2 Hz, 1H), 5.86 (d, *J* = 8.8 Hz, 2H), 5.16 (s, 2H).

138 To a solution of **S11** (6.16 g, 17.7 mmol), 7-*{tert-Butoxycarbonyl}amino*heptanoic  
139 acid (4.35 g, 17.7 mmol), and DIPEA (4.62 mL, 26.5 mmol) in CH<sub>2</sub>Cl<sub>2</sub>-*N,N*-dimethyl-  
140 acetamide (DMA: 10:1, 170 mL), HATU (10.2 g, 26.8 mmol) was added at 0°C under  
141 Ar atmosphere. After stirring for 1 h at the same temperature, the solution was warmed  
142 to room temperature and stirred for 4 h, and then 4-dimethylaminopyridine (DMAP:  
143 250 mg, 2.04 mmol) was added, and stirred further 17 h at ambient temperature. After  
144 stirring for 48 h at 30°C, the resulting solution was diluted with CH<sub>2</sub>Cl<sub>2</sub> (1.2 L) and  
145 washed with water (0.6 L), 1N HCl aq. (0.6 L) twice, sat. NaHCO<sub>3</sub> aq. (0.6 L) and brine  
146 (0.6 L). The combined organic layer was dried over Na<sub>2</sub>SO<sub>4</sub>, filtered, and concentrated  
147 *in vacuo*. The residue was purified by silica gel column chromatography (elution with  
148 10-50% AcOEt/heptane). Next, the resulting rough solid was suspended in AcOEt (150  
149 mL) at 50°C for 1 h and IPE (300 mL) was added, and the mixture was cooled on

150 ice-bath. A precipitate was collected, and thus **S12** (7.14 g, 70% yield, pale yellow  
151 solid) was obtained. **S12**: <sup>1</sup>H-NMR (400 MHz, CDCl<sub>3</sub>) δ 8.20 (d, *J* = 8.8 Hz, 2H), 7.97  
152 (s, 1H), 7.76 (d, *J* = 8.2 Hz, 2H), 7.75-7.72 (m, 3H), 7.72 (d, *J* = 15.6 Hz, 1H), 7.54 (d,  
153 *J* = 15.6 Hz, 1H), 7.37 (d, *J* = 8.2 Hz, 2H), 3.13 (m, 2H), 2.39 (t, *J* = 6.8 Hz, 2H),  
154 1.79-1.72 (m, 2H), 1.49-1.34 (m, 6H), 1.46 (s, 9H). HPLC: *t*<sub>R</sub> = 8.74 min, purity; 97.1%  
155 (λ = 254 nm).

156 To a solution of **S12** (2.50 g, 4.34 mmol) in CH<sub>2</sub>Cl<sub>2</sub> (125 mL), TFA (63 mL)  
157 was added at 0°C under Ar atmosphere. After stirring 1.5 h at the same temperature, the  
158 resulting solution was concentrated *in vacuo*. The residue was dissolved in CH<sub>2</sub>Cl<sub>2</sub>,  
159 poured into sat. NaHCO<sub>3</sub>aq./water (2:1, 300 mL) and stirred for 1 h. The precipitate was  
160 collected by filtration, washed with water (20 mL) twice, dried *in vacuo*, and thus **S13**  
161 (2.05g, 99% yield, pale orange solid) was obtained. **S13**: <sup>1</sup>H-NMR (400 MHz,  
162 CF<sub>3</sub>CO<sub>2</sub>D) δ 8.13 (d, *J* = 8.7 Hz, 2H), 7.92 (d, *J* = 15.5 Hz, 1H), 7.86 (d, *J* = 8.2 Hz,  
163 2H), 7.80 (d, *J* = 8.7 Hz, 2H), 7.66 (d, *J* = 15.5 Hz, 1H), 7.43 (d, *J* = 8.2 Hz, 2H), 6.80  
164 (s, 1H), 3.33-3.31 (m, 2H), 2.71 (t, *J* = 7.8 Hz, 2H), 1.92-1.91 (m, 4H), 1.61-1.58 (m,  
165 4H). HPLC (MeCN/water/TFA=500/500/1): *t*<sub>R</sub> = 9.85 min, purity; 95.7% (λ = 254 nm).

166 To a solution of **CANDDY\_MLN** (MLN2238 derived CANDDY tag: 0.72 g, 2.0 mmol,  
167 synthesized by WO2018092723) in DMF/CH<sub>2</sub>Cl<sub>2</sub> (1:1, 20 mL), DIPEA (0.32 mL, 1.9  
168 mmol) and HATU (0.76 g, 2.0 mmol) were added at 3°C. After stirring at same  
169 temperature for 30 min, **S13** (0.90g, 1.9 mmol) was added and warmed to room  
170 temperature, stirred for further 3 h at room temperature. The resulting solution was  
171 evaporated, diluted with water (200 mL), and stirred. A precipitate was collected by  
172 filtration, dried *in vacuo*, and thus **MDM2-CANDDY** (1.0 g, 65% yield, white solid)  
173 was obtained. **MDM2-CANDDY**: <sup>1</sup>H-NMR (400 MHz, DMSO-d<sub>6</sub>) δ 10.23 (s, 1H),  
174 8.78 (dd, *J* = 5.9, 5.9 Hz, 1H), 8.12 (d, *J* = 8.9 Hz, 2H), 7.96 (d, *J* = 15.8 Hz, 1H),  
175 7.91-7.98 (m, 2H), 7.82 (d, *J* = 8.5 Hz, 2H), 7.76 (d, *J* = 8.9 Hz, 2H), 7.67 (d, *J* = 8.5 Hz,  
176 2H), 7.64 (d, *J* = 15.8 Hz, 1H), 7.52 (s, 3H), 4.25-4.31 (m, 1H), 3.81-3.91 (m, 2H),  
177 2.97-3.07 (m, 2H), 2.33 (t, *J* = 7.2 Hz, 2H), 1.53-1.59 (m, 3H), 1.38-1.46 (m, 4H),  
178 1.25-1.31 (m, 4H), 0.87 (d, *J* = 6.5 Hz, 3H), 0.84 (d, *J* = 6.5 Hz, 3H). HR-MS (FAB)  
179 *m/z*: 819.1577 (Calcd for C<sub>37</sub>H<sub>42</sub>Cl<sub>2</sub>IN<sub>4</sub>O<sub>5</sub> [M+H]<sup>+</sup> 819.1577). HPLC: *t<sub>R</sub>* = 7.99 min,  
180 purity; 95.7% (λ = 254 nm).  
181

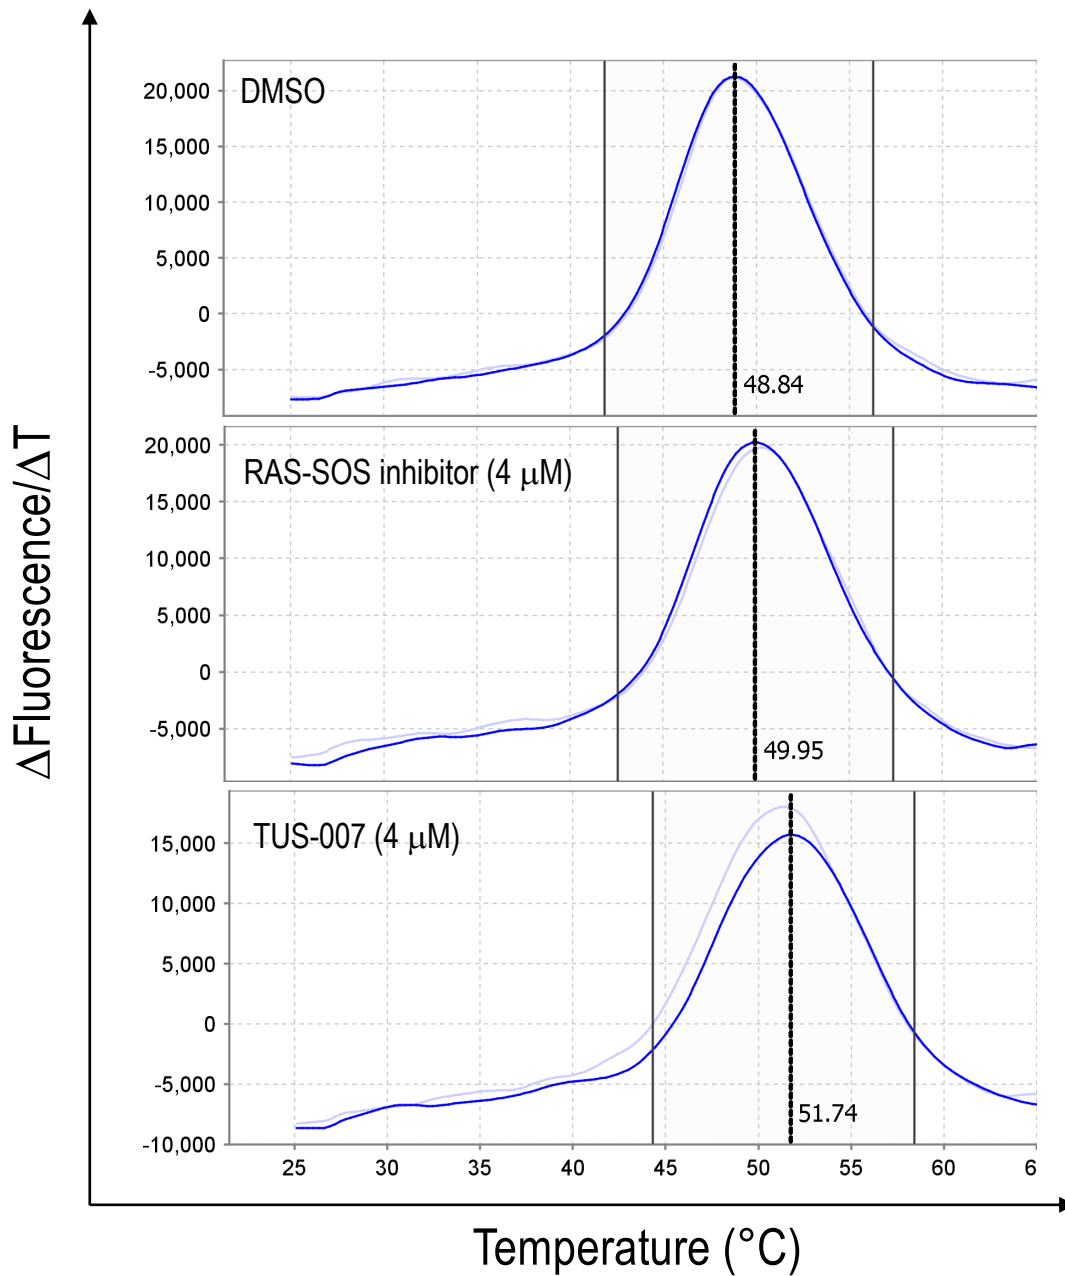

|                   | $T_m$ ( $^{\circ}\text{C}$ ) |
|-------------------|------------------------------|
| DMSO              | $48.8 \pm 0.05$              |
| RAS-SOS inhibitor | $50.1 \pm 0.15^*$            |
| TUS-007           | $51.5 \pm 0.2^{*,\#}$        |

**Supplementary Fig. 1. Estimation of  $T_m$  value of KRAS G12D incubated with TUS-007.**

KRAS G12D was mixed with DMSO, RAS-SOS inhibitor (4  $\mu\text{M}$ ) or TUS-007 (4  $\mu\text{M}$ ) and incubated under heating from 25  $^{\circ}\text{C}$  to 99  $^{\circ}\text{C}$ . The denature of KRAS G12D was monitored by the fluorescence. The typical curve of each group was shown in upper panels. The means of  $T_m$  values were shown in lower table (mean  $\pm$  SEM; n = 2). \* P < 0.05 vs. DMSO, # P < 0.05 vs. RAS-SOS inhibitor.

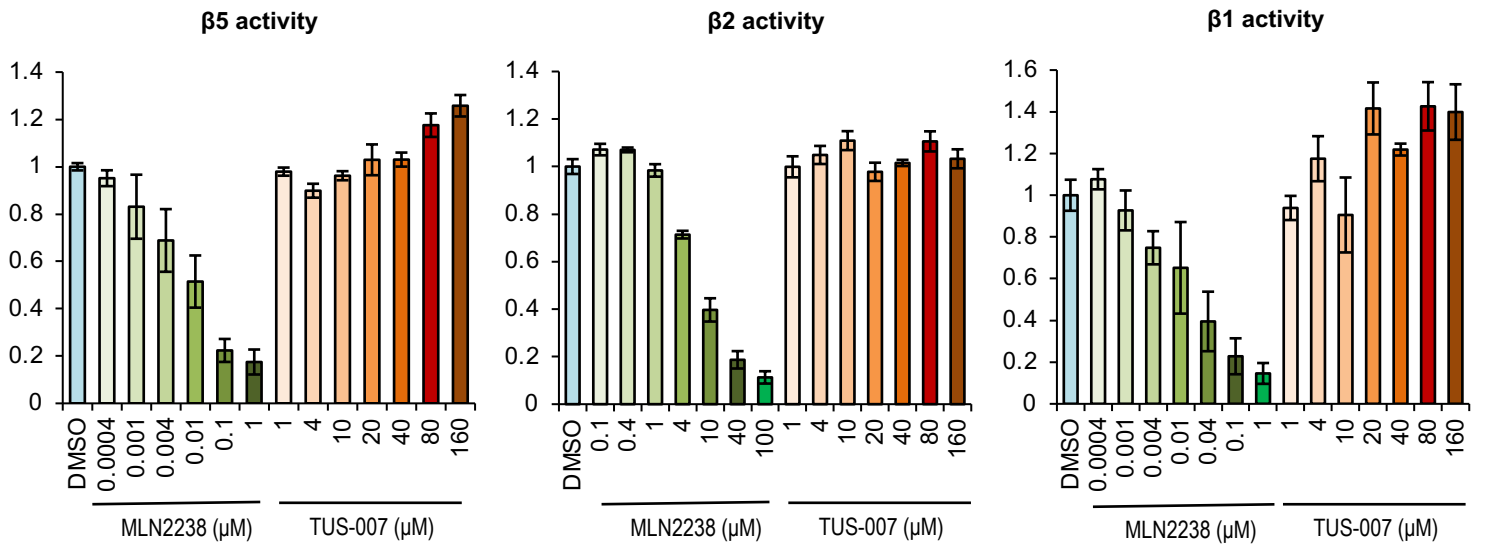

**Supplementary Fig. 2. Effects of TUS-007 on proteasome activity levels.**

The levels of chymotrypsin-like ( $\beta 5$ ), trypsin-like ( $\beta 2$ ), and caspase-like ( $\beta 1$ ) proteasome activities was monitored by Suc-LLVY-AMC, Bz-VGR-AMC, and Z-LLE-AMC, respectively. AMC fluorescence was monitored by a plate reader with excitation and emission filters of 360 and 460 nm, respectively (DMSO, 30 min = 1) (mean  $\pm$  SEM; n = 2-3).

**a**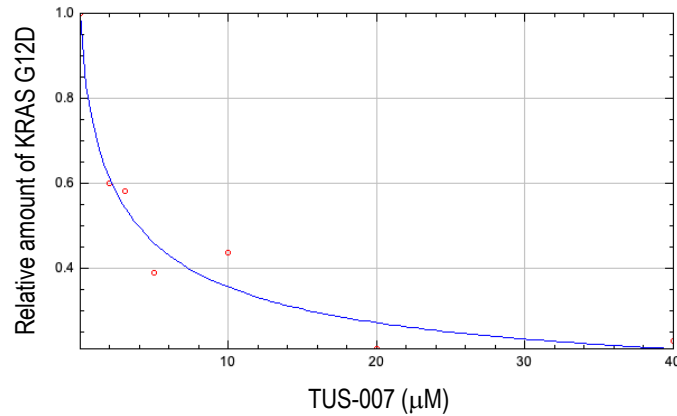**b**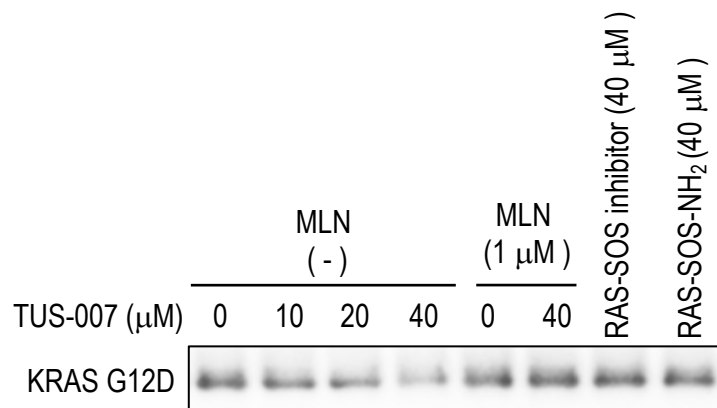**c**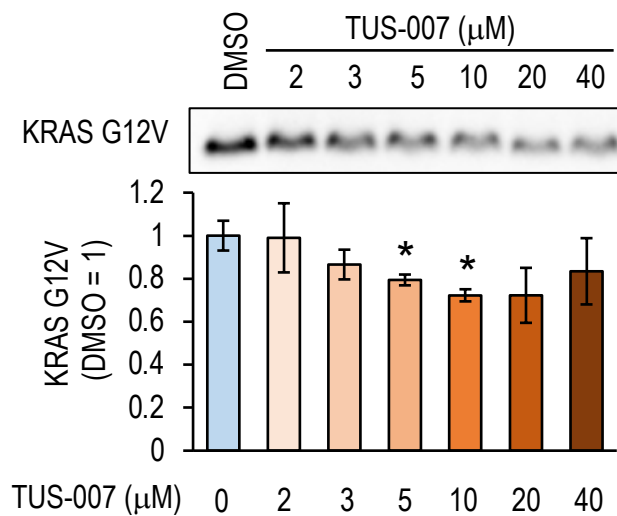

**Supplementary Fig. 3. TUS-007 induced degradation of KRAS G12D/V in cell free assay.**

**a**, Evaluation of the correlation between relative amount of KRAS G12D and concentration of TUS-007 were approximated with Rodbard. The DC50 was estimated about 4 μM. **b**, A proteasome inhibitor MLN2238 repressed KRAS G12D chemical knockdown by 26S proteasome. RAS-SOS inhibitor and RAS-SOS NH<sub>2</sub> did not induce KRAS G12D chemical knockdown. KRAS G12D incubated with 26S proteasome and agents as indicated for 3 h. **c**, KRAS G12V protein level was lower after incubation with TUS-007 at the indicated concentrations in the presence of 26S proteasome for 1 h, indicating successful KRAS G12V degradation by TUS-007 (mean ± SEM; n = 3). \* P < 0.05 vs. DMSO.



**a**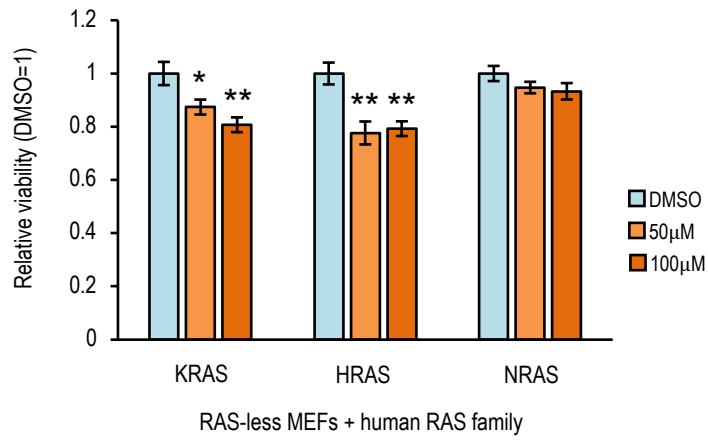**b**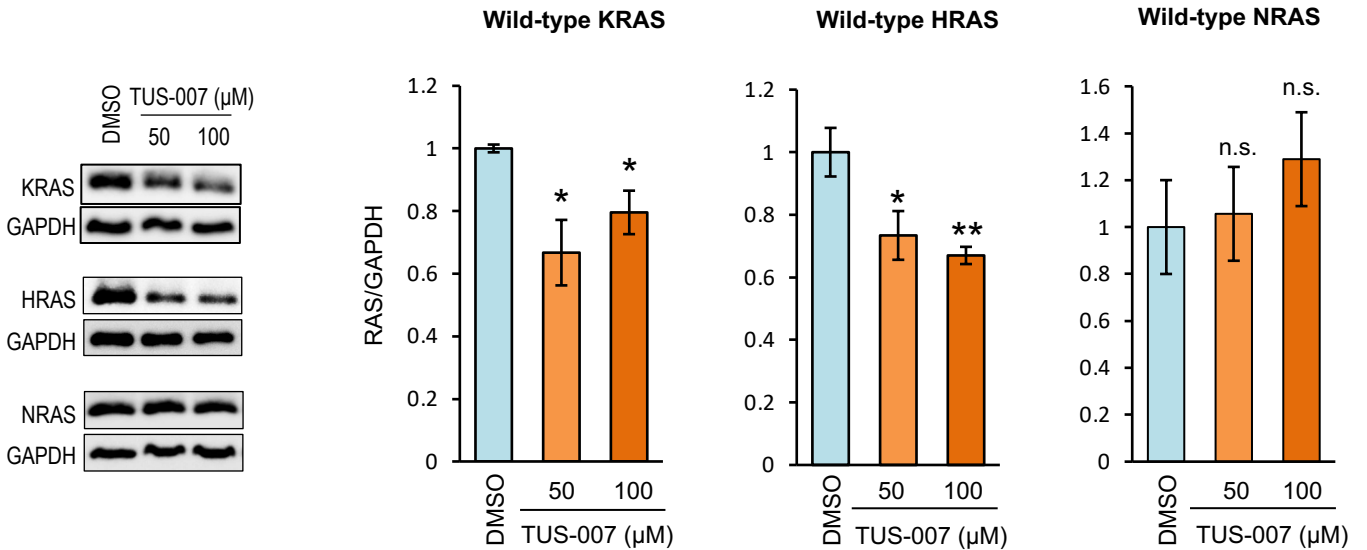**Supplementary Fig. 4. Selective chemical-knockdown of RAS variants in RAS-less MEFs expressing different types of human RAS.**

**a**, Relative viability of RAS-less MEFs expressing WT human RAS family members after incubation with TUS-007 or DMSO. (mean  $\pm$  SEM; n = 3-5). \*P < 0.05 and \*\*P < 0.01 vs. DMSO. **b**, Degradation of WT human RAS family members in RAS-less MEFs treated with TUS-007 or DMSO for 72 h (mean  $\pm$  SEM; n = 4-5). \*P < 0.05 and \*\*P < 0.01 vs. DMSO.

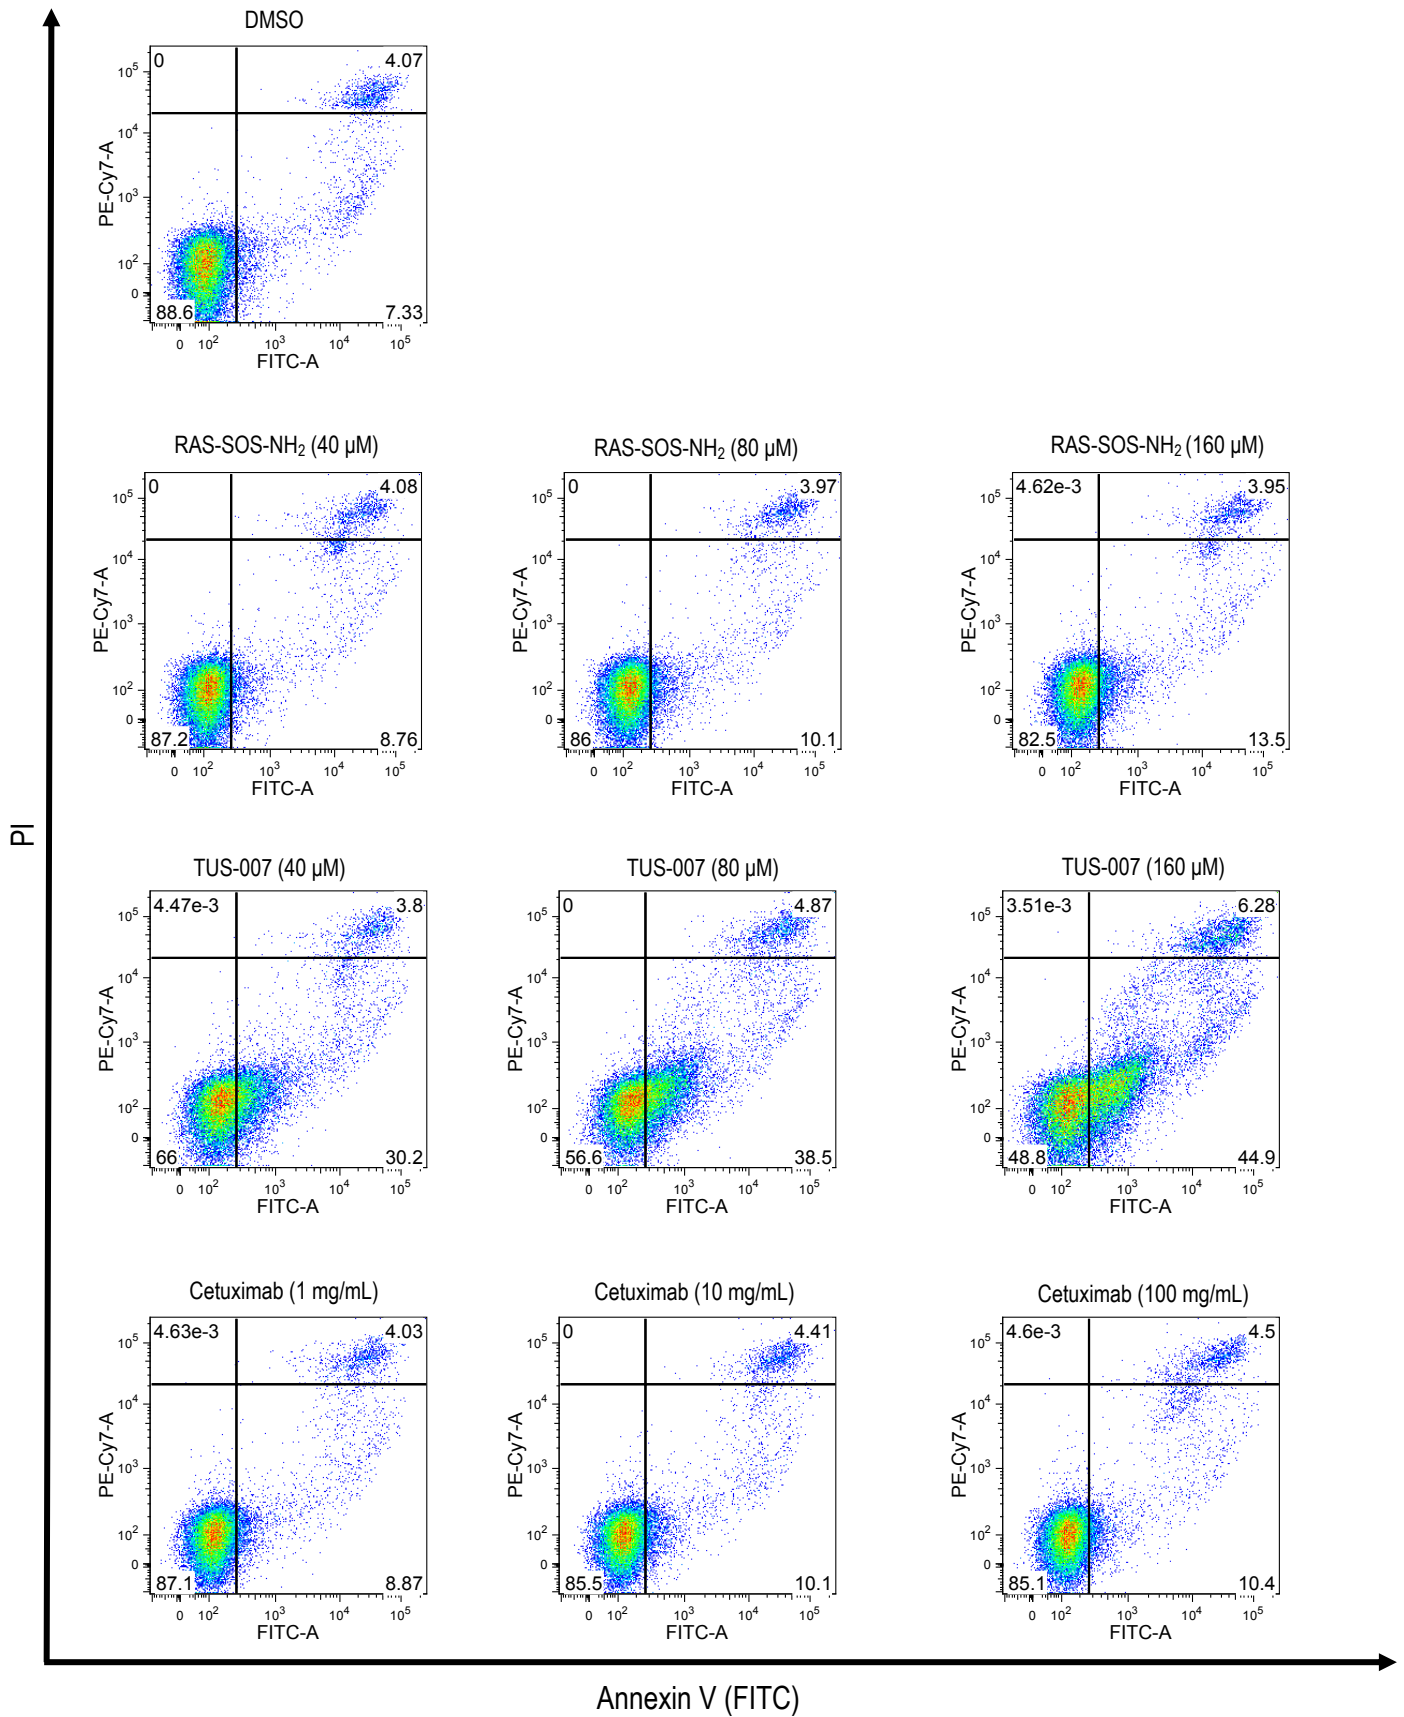

**Supplementary Fig. 5. FACS plots for Annexin V- PI staining of SW620-Luc cells.**

SW620-Luc cells were treated with the indicated agents for 48 h, followed by staining with Annexin V-FITC and PI. The typical plots are shown.

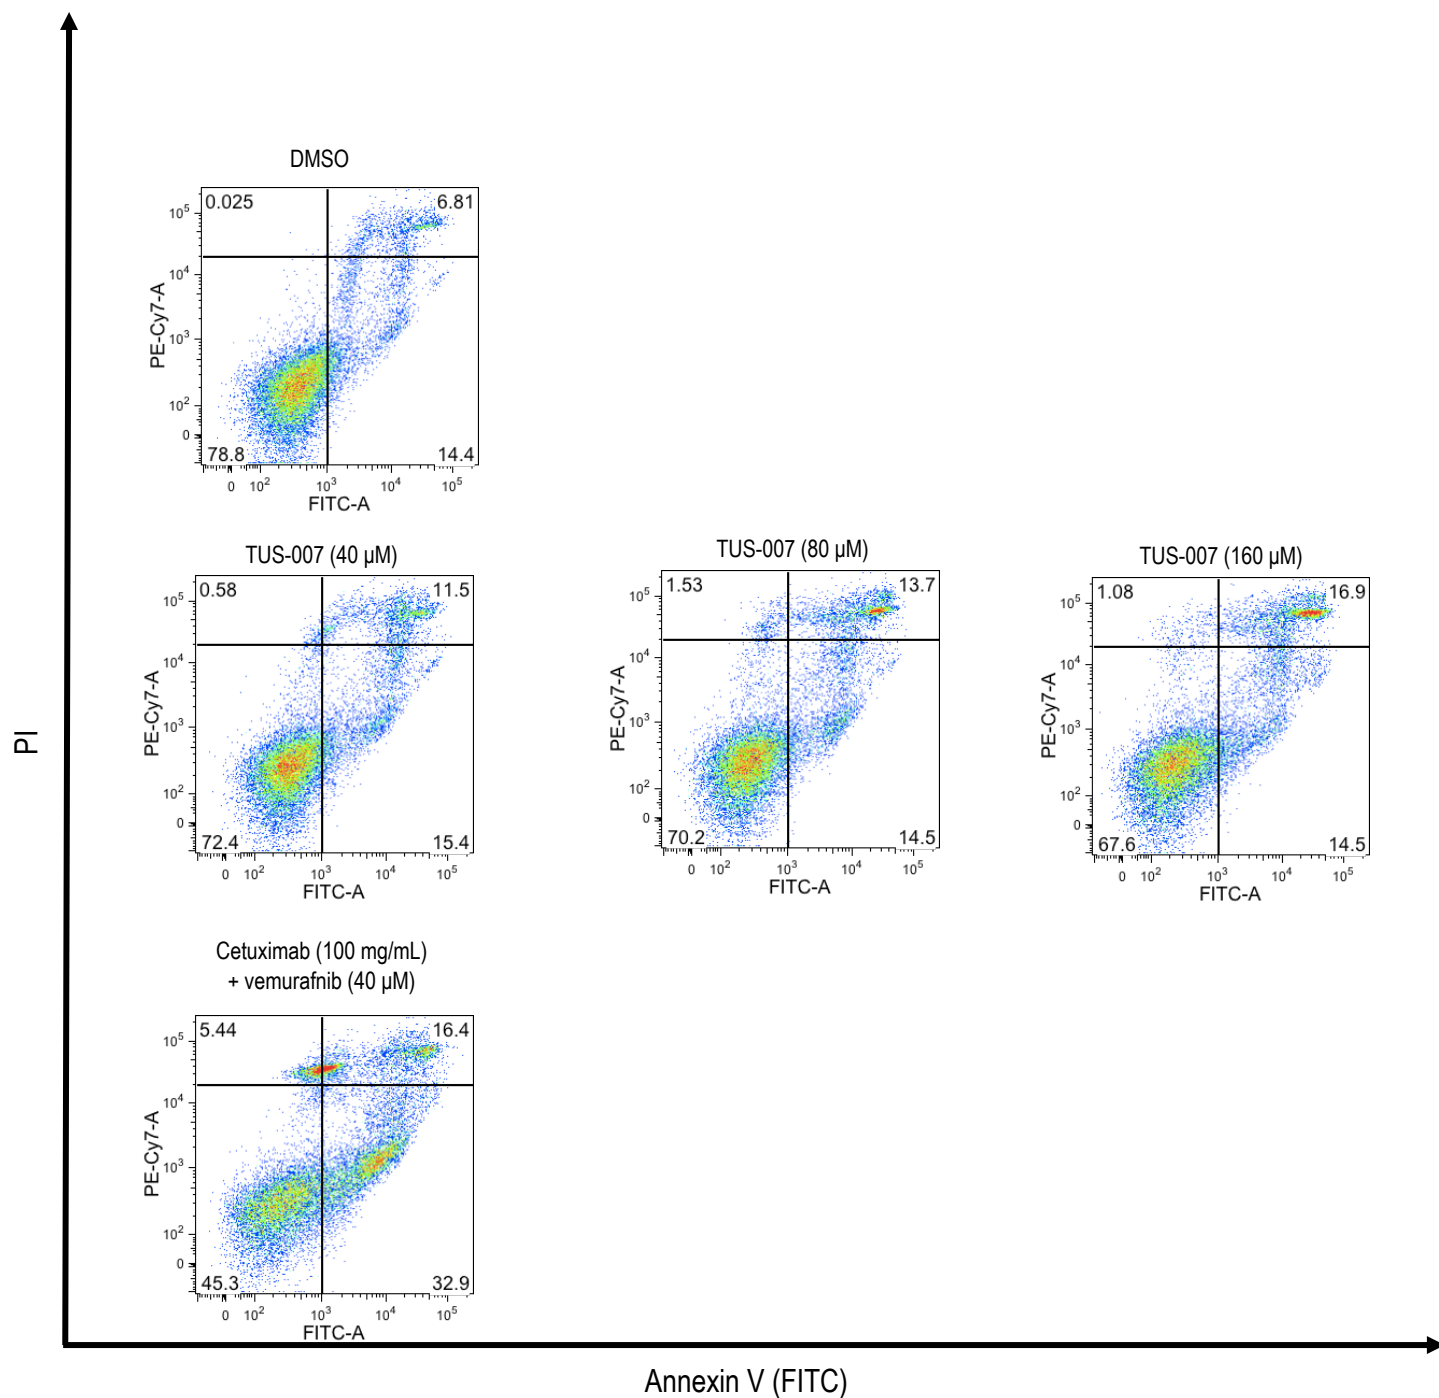

**Supplementary Fig. 6. FACS plots for Annexin V- PI staining of HT-29-Luc cells.**

HT-29-Luc cells were treated with the indicated agents for 48 h, followed by staining with Annexin V-FITC and PI. The typical plots are shown.

**a**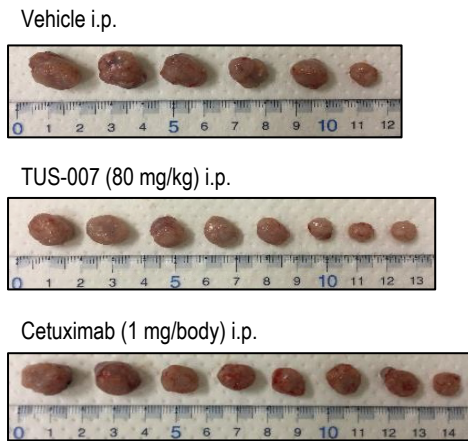**b**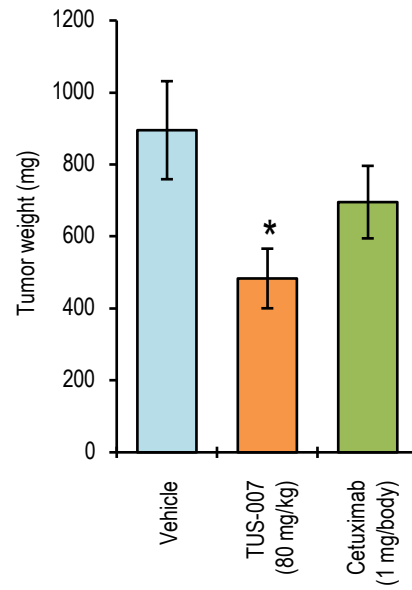**c**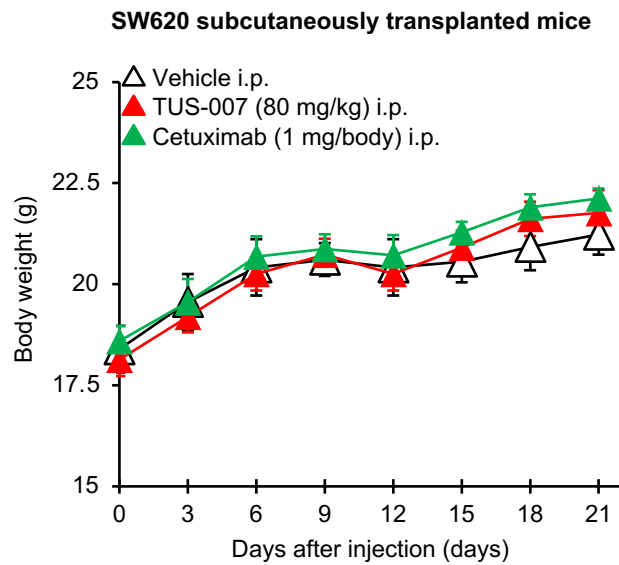

**Supplementary Fig. 7. Effects of TUS-007 on the growth of colon cancer subcutaneous xenografts and toxicity.**

**a**, Tumors of SW620-Luc cells at day 21 from the same mice shown in Fig. 2e (n = 6–8). **b**, Comparison of SW620-Luc tumor weight at 21 days after injection (mean ± SEM; n = 6–8). \*P < 0.05 vs. vehicle alone. **c**, Body weight changes in mice with SW620-Luc cells transplanted subcutaneously (mean ± SEM; n = 6–8). Treatment with TUS-007 did not affect the body weight.

**a**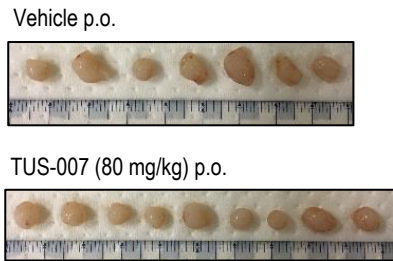**b**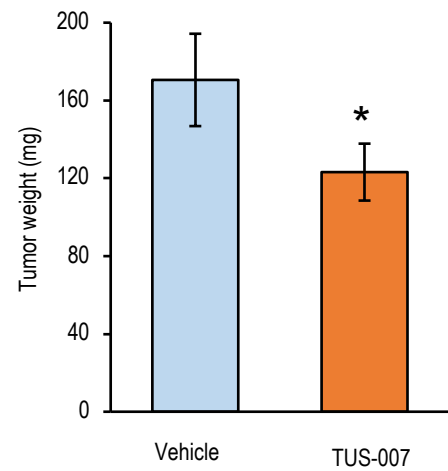**c**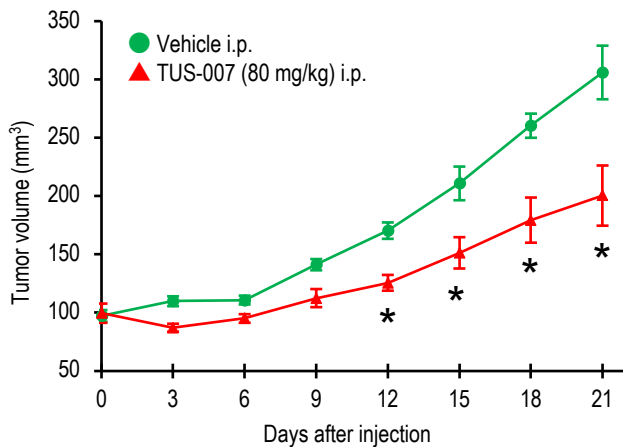**d**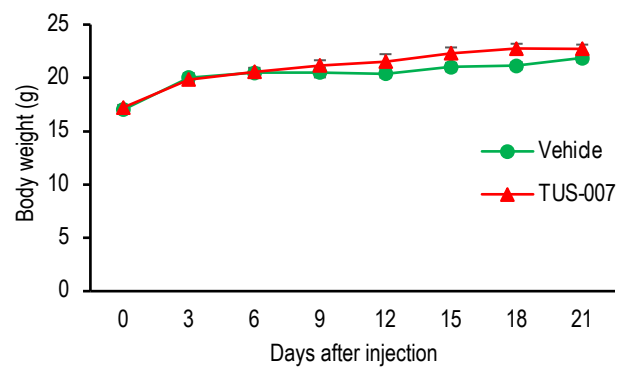

**Supplementary Fig. 8. Effects of TUS-007 on the growth of pancreatic cancer subcutaneous xenografts and toxicity.**

**a**, Tumors of SW1990 cells from the same mice shown in Fig. 3e at 21 days after p.o. administration. **b**, Comparison of SW1990 tumor weight in **a** in this figure at 21 days after p.o. administration (mean  $\pm$  SEM; n = 6-9). \*P < 0.05 vs. vehicle alone. **c**, Tumor volume in mice with SW1990 cells transplanted subcutaneously and treated with i.p. administered TUS-007 or vehicle (mean  $\pm$  SEM; n = 6-9). The agents were administered every three days. \*P < 0.05 vs. vehicle. **d**, Body weight changes in mice with SW1990 cells transplanted subcutaneously (mean  $\pm$  SEM; n = 6-9). i.p. treatment with TUS-007 did not affect the body weight.

**a**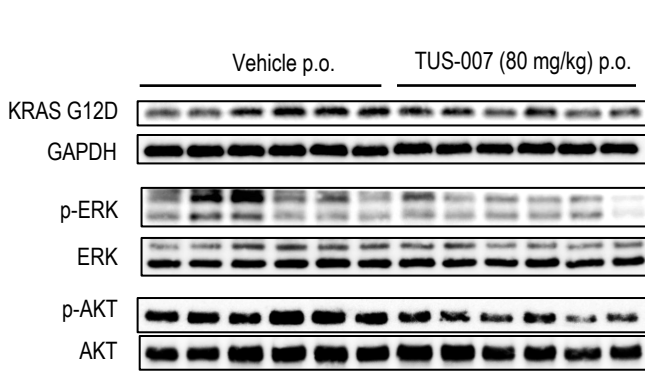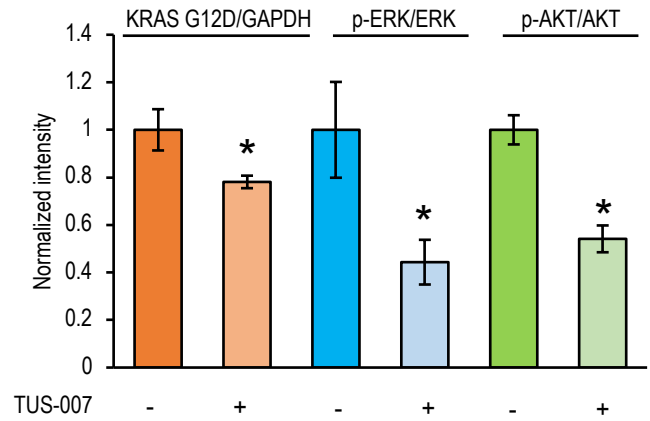**b**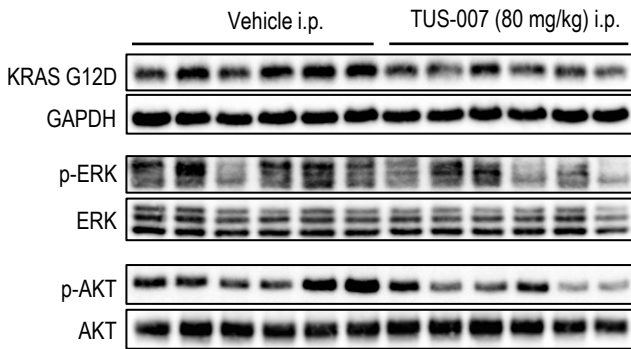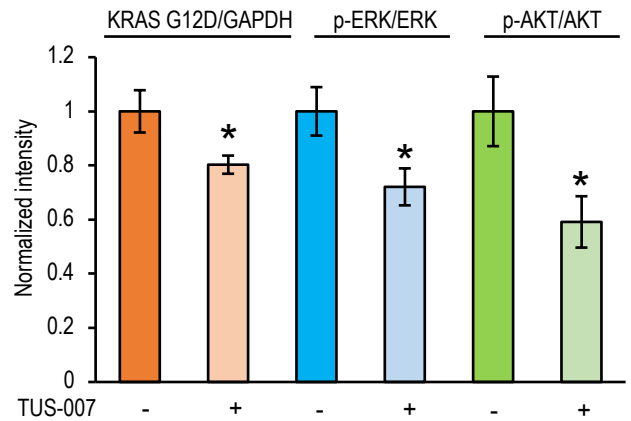

**Supplementary Fig. 9. Effect of of TUS-007 on RAS signaling in of pancreatic cancer subcutaneous xenografts. .** Immunoblotting of KRAS and downstream signaling molecules in tumors from the same mice used in Fig 3a (a: p.o treatment) and Extended Data Fig.8c (b: i.p. treatment). The quantitative analysis of the immunoblotting was shown as bar graph, where the KRAS values were normalized to GAPDH, the p-ERK values were normalized to the total ERK, and the p-AKT values were normalized to the total AKT (mean  $\pm$  SEM; n = 6). \*P < 0.05 vs. vehicle.

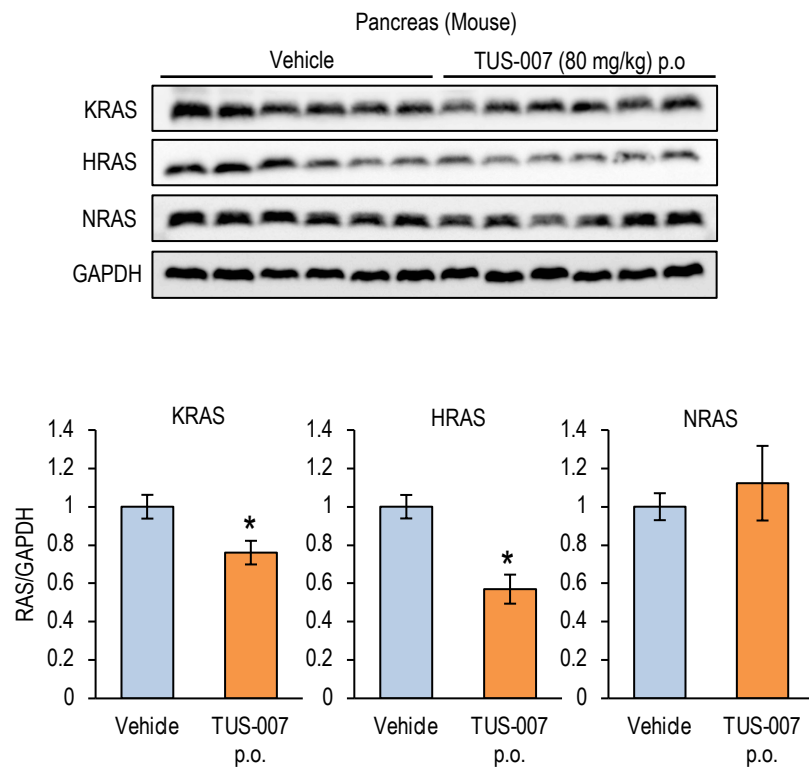

**Supplementary Fig. 10. Effects of oral treatment with TUS-007 on wild type RAS in pancreas.**

The immunoblotting analyses of wt RAS proteins in pancreas from the same mice shown in Fig. 3e. TUS-007 degraded KRAS and HRAS but not NRAS (mean  $\pm$  SEM; n = 6-9). \*P < 0.05 vs. vehicle alone.

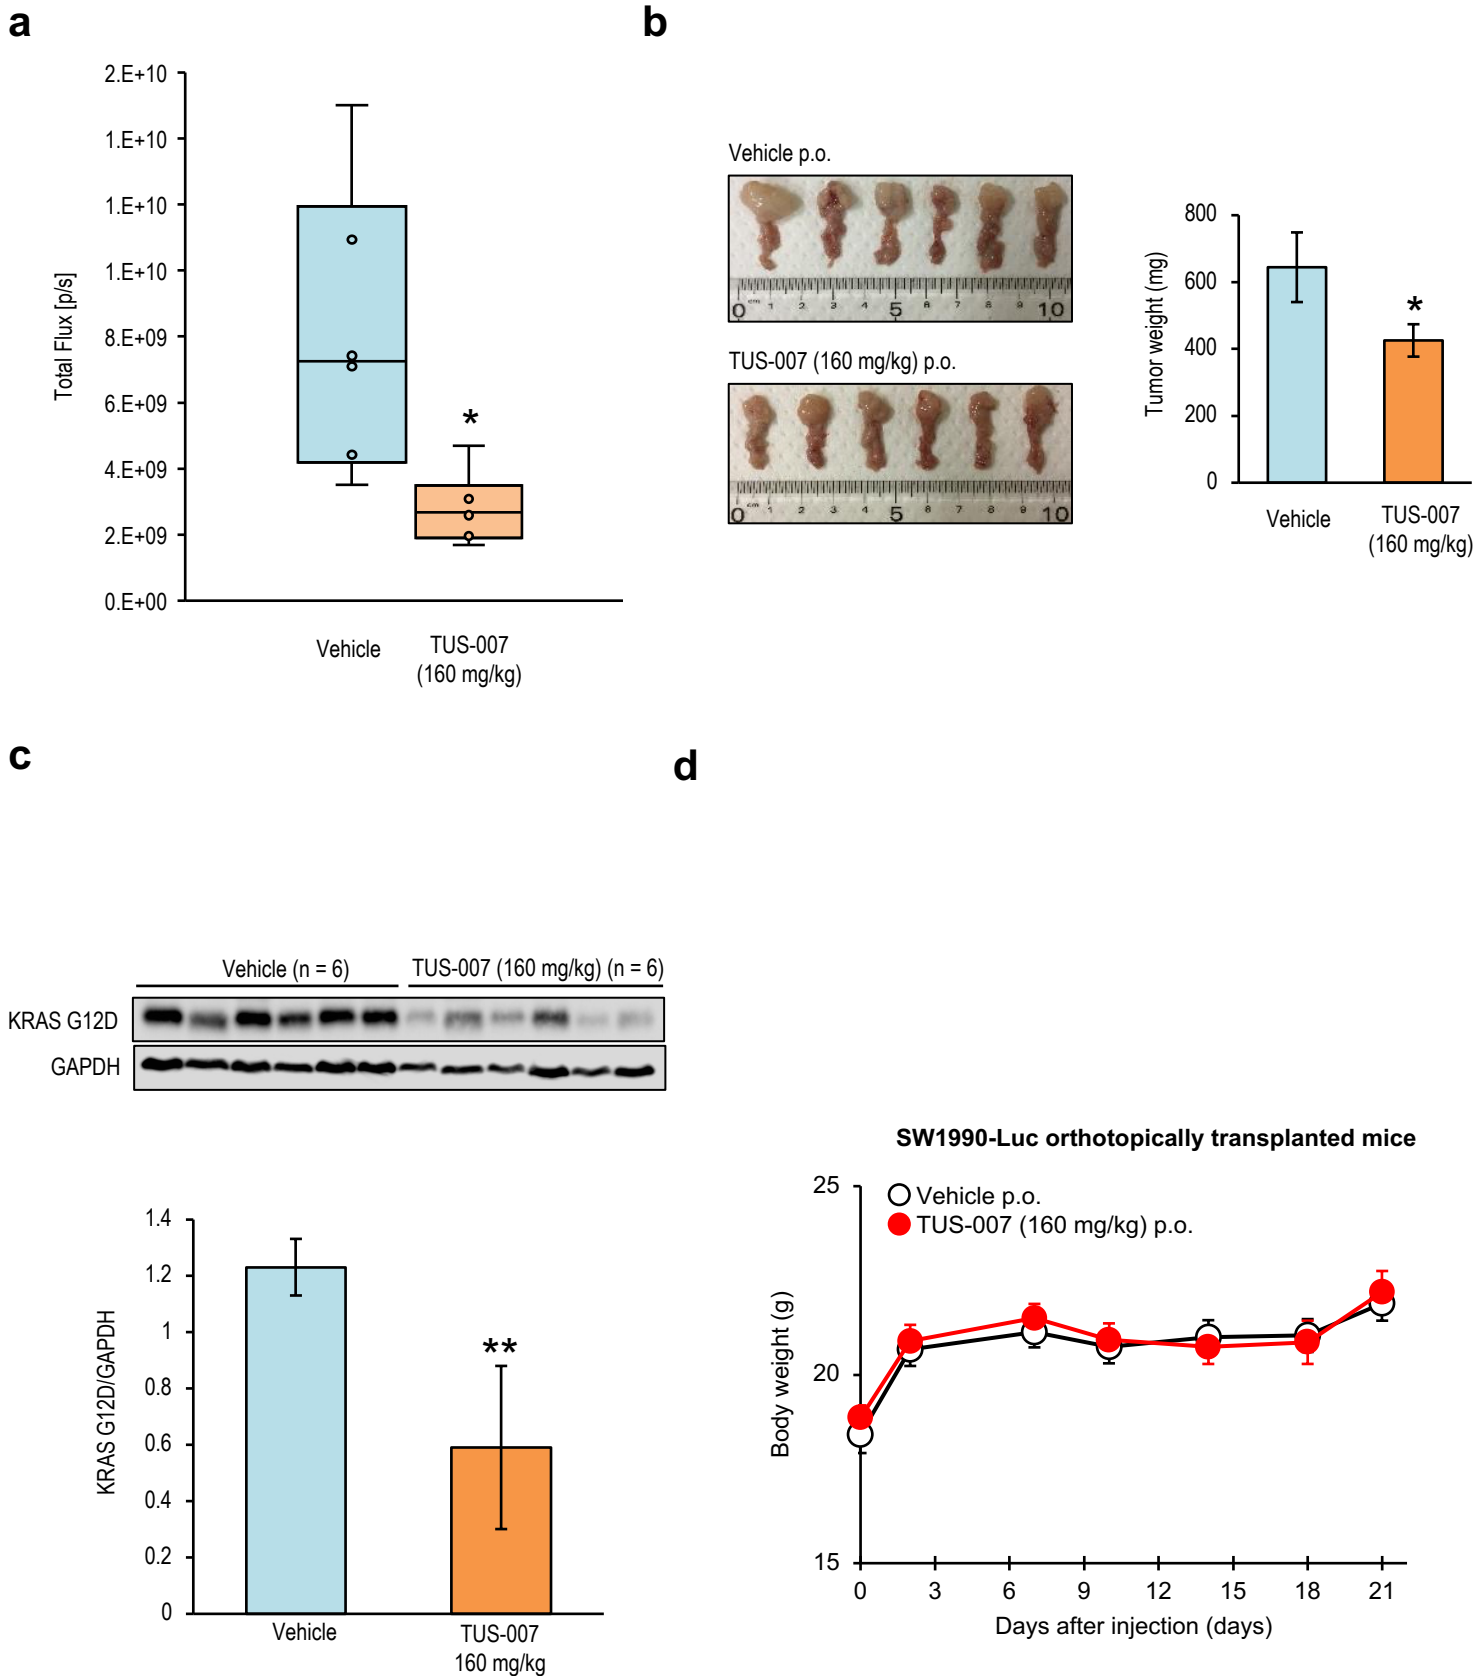

**Supplementary Fig. 11. Effect of TUS-007 on growth of orthotopic pancreatic cancer xenografts expressing mutant KRAS.**

**a**, Tumor growth, as assessed by luciferase signal, in individual mice orthotopically transplanted SW1990-Luc cells treated with TUS-007 (red) or vehicle alone (blue) (mean  $\pm$  SEM;  $n = 6$ ). **b**, Pancreases from orthotopic xenograft model mice at day 21 after treatment with TUS-007 (lower-left panel) or the vehicle alone (upper-left panel) and comparison of their weights (right graph) (mean  $\pm$  SEM;  $n = 6$ ). \* $P < 0.05$  vs. vehicle alone. **c**, Immunoblotting of KRAS G12D in tumor lysates from the same mice used in Fig. 4a. The bar graph shows quantification of KRAS G12D normalized to GAPDH (mean  $\pm$  SEM;  $n = 6$ ). \*\* $P < 0.01$  vs. vehicle alone. **d**, Body weight changes in mice subjected to orthotopical transplantation of SW1990-Luc cells (mean  $\pm$  SEM;  $n = 6$ ). Treatment with TUS-007 did not affect the body weight.



**a**

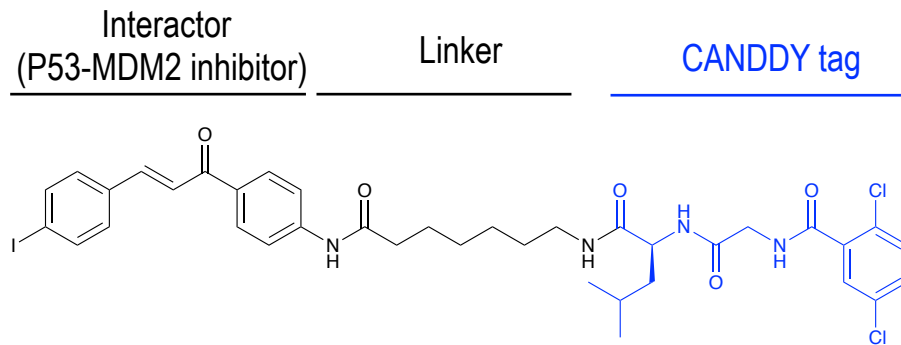

**b**

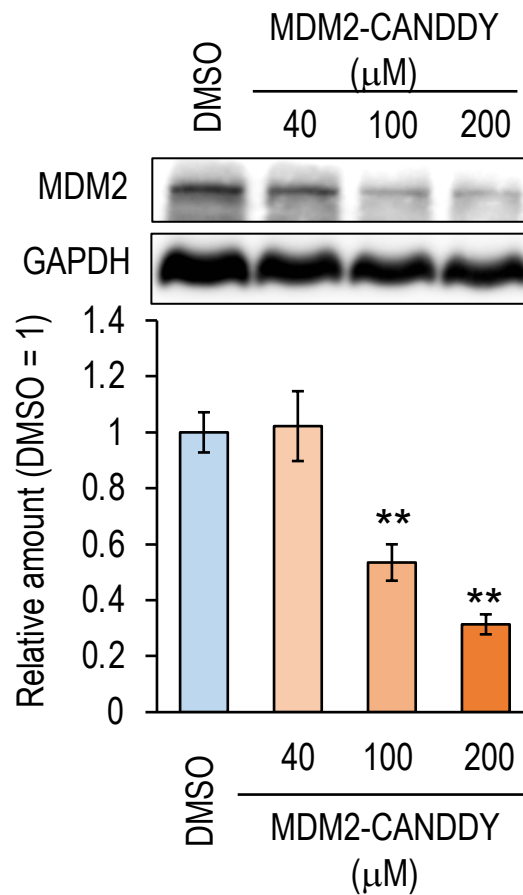

**Supplementary Fig. 12. CANDDY induced degradation of MDM2, a common undruggable target.**

**a**, The structure of MDM2-CANDDY using P53-MDM2 PPI inhibitor, with  $\text{IC}_{50}$  value between 6-25  $\mu\text{M}$ . **b**, The human colon cancer cells HCT-116 were incubated for 48 h with MDM2-CANDDY. MDM2-CANDDY degraded MDM2 in the dose dependent manner (mean  $\pm$  SEM,  $n = 3$ ). \*\*  $P < 0.01$  vs. DMSO.

**Supplementary Table 1. The concentration of TUS-007 in pancreas was maintained for 72h.**

The concentration of TUS-007 in pancreas from healthy wild-type mice i.p. treated with TUS-007 at 80 mg/kg (means  $\pm$  SE, n = 5). The samples were obtained at indicated time points after i.p. injection. The concentration of TUS-007 was measured with HPLC.

| Hours after i.p                | 1h              | 20h             | 72h             |
|--------------------------------|-----------------|-----------------|-----------------|
| TUS-007 in pancreas<br>(ng/mg) | 45.7 $\pm$ 20.3 | 55.0 $\pm$ 28.6 | 61.8 $\pm$ 30.0 |
